# Supplementary material for: STING-dependent sensing of self-DNA drives silica-induced lung inflammation
Source: PubMed Central journal article supplement (PMC6283886; doi:10.1038/s41467-018-07425-1), 2018-12-06
Supplement: 41467_2018_7425_MOESM3_ESM.pdf [file 41467_2018_7425_MOESM3_ESM.pdf]

Description of additional supplementary files

Movie 1- Non exposed macrophages

Movie 2- WT BMDMs silica
